# Supplementary material for: Derivatives of Bst-like Gss-polymerase with improved processivity and inhibitor tolerance
Source: PubMed Central journal article supplement — Nucleic Acids Res. 2017 Jul 26;45(16):9595–610. doi: 10.1093/nar/gkx645 (PMC5766155; doi:10.1093/nar/gkx645), 2017-07-26

**Supplementary table 1.** Primers for a quantification of WGA products

| Name     | 5'-sequence-3'                     |
|----------|------------------------------------|
| ALB      | GACTTGCCAAGACATATGAAACC            |
|          | TCCAACAATAAACCTACCACTTTG           |
|          | HEX-TGCTGTGCCGCTGCAGATCC-BHQ1      |
| ALDH1L1  | ACATGTTTCATAGCCAAGGAGGA            |
|          | CTCCCAAAGCCCACATGAAG               |
|          | FAM- AGGAATCTGTCACACAGATGACC -BHQ1 |
| IL10RA   | TTCCATGTTACAGATGAGGAACTAA          |
|          | CAGCTCTGACTCTTATCAGCTTTG           |
|          | HEX-CCCTGACCAAATTACTTACCCTCTC-BHQ1 |
| MET      | CAAGATCGTCAACAAAAACAATG            |
|          | AAGTGGGGAAGTGTGACTTA               |
|          | FAM-CGGACCCAATCATGAGCACTG-BHQ1     |
| BCMO379  | GAATGCAGAAGTGGGCACA                |
|          | CAGGAGGGAATTATTATGTAAAGAG          |
|          | HEX-CAAAAGTGGCATCTACA -BHQ1        |
|          | STBHQ1-CAGCCACGGCCCTGAA-P          |
| BDNF     | CAACTTAGACCATTATTTCCAGA            |
|          | TACCGATGTGGCAGGAGAGA               |
|          | ROX-CTGTCTTTACTCACTGTTG-BHQ2       |
| ADIPOQ   | CATCAGAATGTGTGGCTTGC               |
|          | AAGCAGCCTGGAGAACTGGA               |
|          | HEX- CAGATCCTGCCCTTCAAAAAC -BHQ1   |
| PPARGc1a | AACAAGCACTTCGGTCATC                |
|          | CTTTCATCTTCGCTGTCATCA              |
|          | ROX-ACAAGACCGGTGAACTGAGG-BHQ2      |
| APOA2    | CCAGAGAAATAACTTGGAATCCT            |
|          | AGAGGACAAGCACATGGAAGA              |
|          | HEX-CCTGTTGCACTCAAGTCCAAG -BHQ1    |
| CKMM     | TGCCAGTCCCTTACTTTCTC               |
|          | AGCCTCCAGCAAATGGTATG               |
|          | HEX-ACCTGCCCCTGGCTCCC -BHQ1        |
| EGFR     | GTCAAGATCACAGATTTTGGGCT            |
|          | CCTCCTTACTTTGCCTCCTTCTG            |
|          | FAM-CTGGGTGCGGAAGAGAAAGAATACC-BHQ1 |
| ERBB2    | CATCTTCCACAAGAACAACCAG             |
|          | GTCTGAGAGAAGAGGCAGCA               |
|          | FAM-AGACACCAACCGCTCTCGGGC -BHQ1    |

|        |                                 |
|--------|---------------------------------|
| NBPF3  | GTGGTTTTGGCAGCAATAG             |
|        | CATCTTCAGCGTTCCCAGT             |
|        | HEX-TGGGGTAATGTCCCCAAA -BHQ1    |
| F II   | GAACCAATCCCGTGAAAG              |
|        | AGAGAGCTGCCCATGAATAG            |
|        | HEX-CATTGAGGCTCGCTGAGAG -BHQ1   |
| F XI   | GTGAGTTGGATGAGGAGTTAGC          |
|        | CTTGTTGTCGTGTATTTTCCTC          |
|        | HEX-TCTCTCTCTCGCCCTCTCATC -BHQ1 |
| KRAS   | GACTGAATATAAACTTGTGGTAGTTGGA    |
|        | CATATTCGTCCACAAAATGATTCTG       |
|        | FAM-CTGTATCGTCAAGGCACTCTT -BHQ1 |
| REP2   | GTGTGCTTGTTAATGCGTG             |
|        | AGCAGTTTTTCGTTGGTCTCAT          |
|        | HEX- CTTCGTTCCAGAGCCCA-BHQ1     |
| BHMT   | AGTCAGGAGTGTGGTAAGCCA           |
|        | ACTCACAGGAGCATCCATCA            |
|        | HEX- TTTCAGTCGGGCAGCC-BHQ1      |
| CYP1B1 | GCTACCACATTCCCAACG              |
|        | TTAGAAAGTTCTTCGCCAATG           |
|        | HEX-CATGACCCAGTGAAGTGGC-BHQ1    |
| MTHFR  | CTGAAGCACTTGAAGGAGAAG           |
|        | GCAAGTGATGCCCATGTC              |
|        | HEX-CTGCGGGAGCCGATTTTC -BHQ1    |

**Supplementary Figure 1. WGA efficacy and GC-content or amplicon length of qPCR**

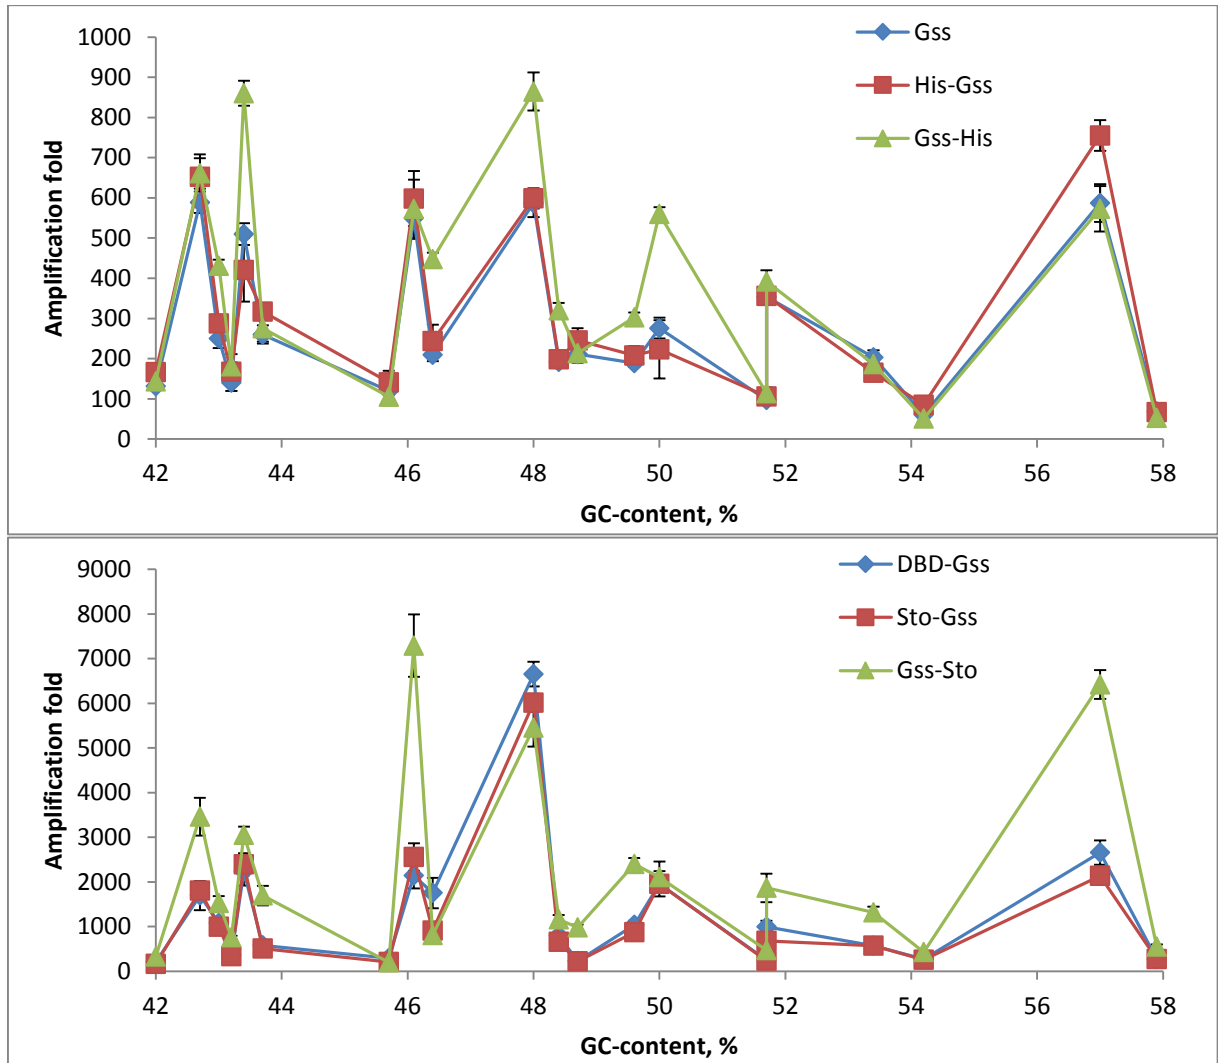

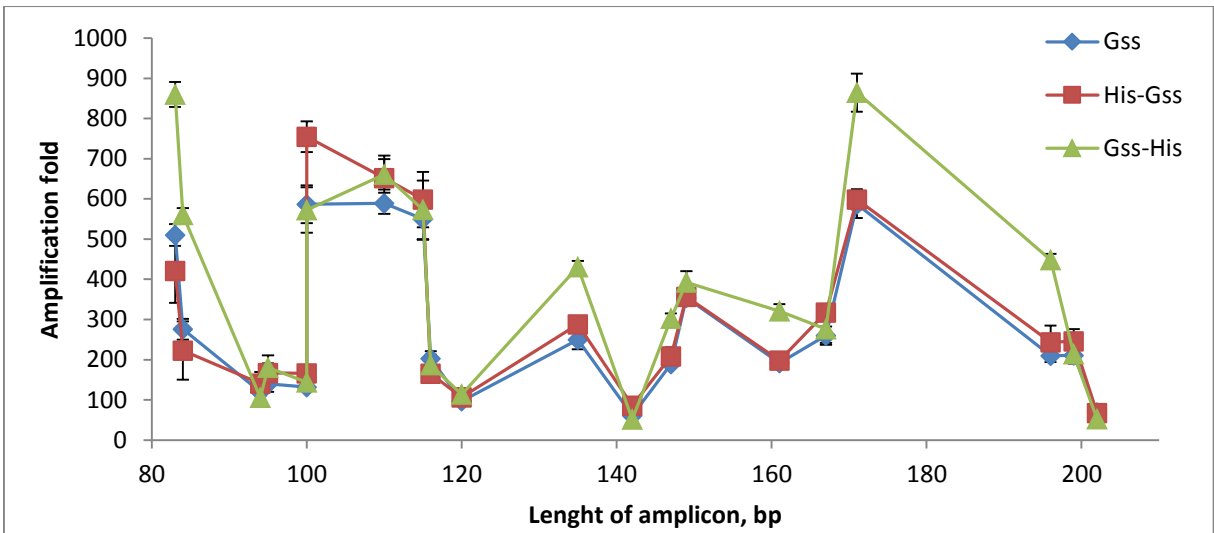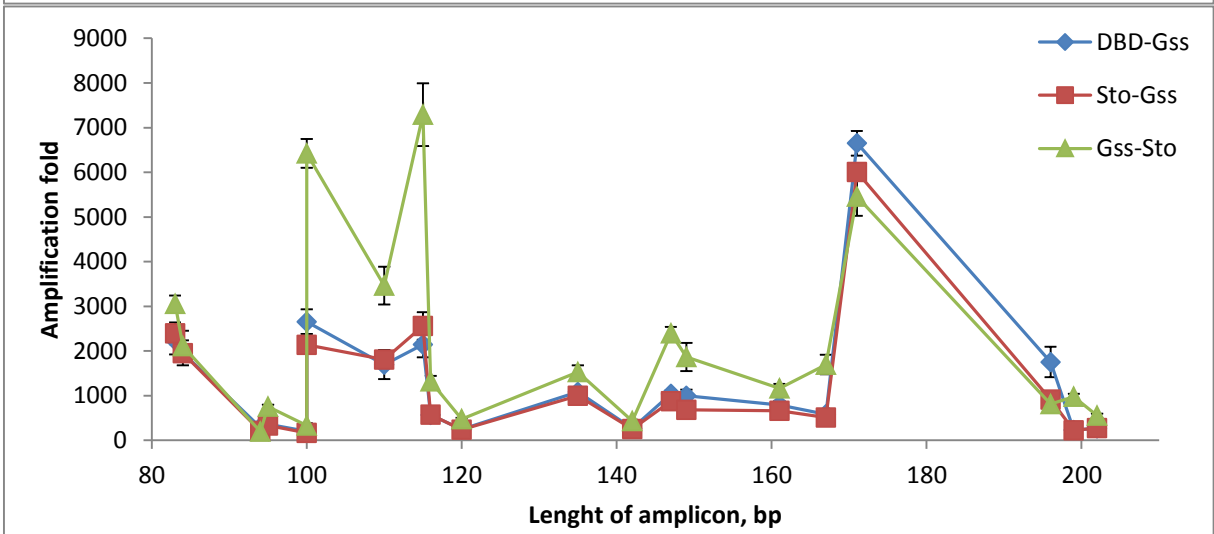

Supplement: gkx645_supp.pdf [file gkx645_supp.pdf]
